# Supplementary material for: High-performance photodetectors based on bandgap engineered novel layer GaSe0.5Te0.5 nanoflakes
Source: Royal Society of Chemistry journal article supplement (doi:10.1039/c6ra09239j), 2016-01-01
Supplement: c6ra09239j1.pdf [file c6ra09239j1.pdf]

## **Supporting Information for**

### **High-performance photodetectors based on bandgap engineered novel layer GaSe<sub>0.5</sub>Te<sub>0.5</sub> nanoflakes**

Xuying Zhong, Weichang Zhou,\* Yong Zhou, Fang Zhou, Chang Liu, Yanling Yin,  
Yuehua Peng and Dongsheng Tang\*

Synergetic Innovation Center for Quantum Effects and Application, Key Laboratory  
of Low-dimensional Quantum Structures and Quantum Control of Ministry of  
Education, College of Physics and Information Science, Hunan Normal University,  
Changsha 410081, P. R. China.

\* Corresponding authors. Tel.: +86 731 88873055; Fax.: +86 731 88873055 E-mail:

[wchangzhou@hunnu.edu.cn](mailto:wchangzhou@hunnu.edu.cn) (Dr. W. Zhou) and [dstang@hunnu.edu.cn](mailto:dstang@hunnu.edu.cn) (Dr. D. Tang)

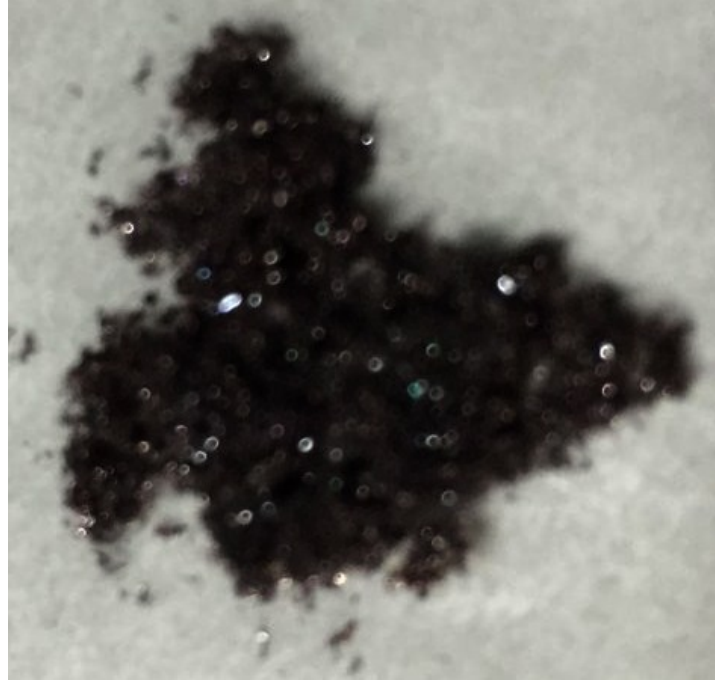

Fig. S1. The photograph of peeled off sample from quartz tube.

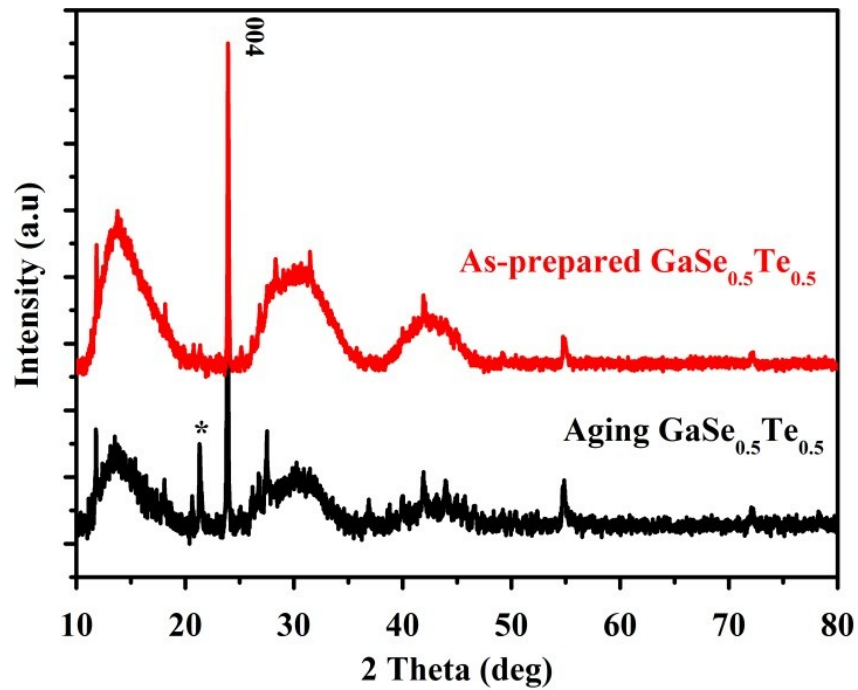

Fig. S2. XRD of peeled off sample. The aging sample was stored in dark condition for several months. The diffraction peak masked with \* is the oxide of GaSe<sub>0.5</sub>Te<sub>0.5</sub>.

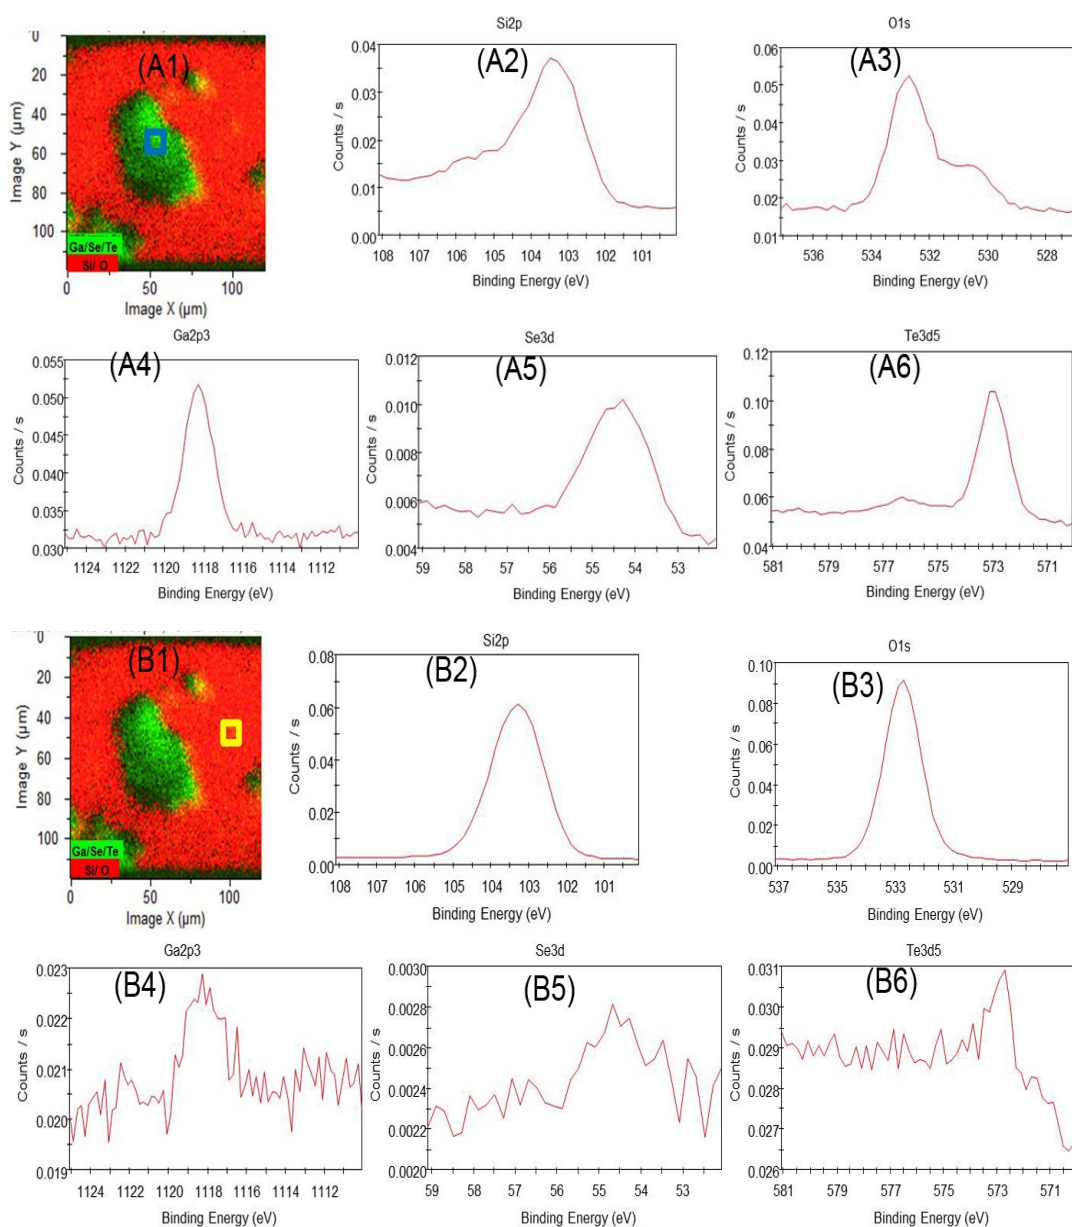

Figure S3. (A1-A6) XPS and corresponding overlaid image of single GaSe<sub>0.5</sub>Te<sub>0.5</sub> nanoflake (blue marked area). (B1-B6) XPS and corresponding overlaid image SiO<sub>2</sub>/Si substrate (yellow marked area).
